# Supplementary material for: Consistency evaluation of tropospheric ozone from ozonesonde and IAGOS aircraft observations: vertical distribution, ozonesonde types and station-airport distance
Source: Copernicus journal article supplement (doi:10.5194/egusphere-2024-1015), 2024-04-30
Supplement: Supplementary file 1 [file egusphere-2024-1015-supplement.pdf]

1 **Consistency evaluation of tropospheric ozone from ozonesonde and**  
 2 **IAGOS aircraft observations: vertical distribution, ozonesonde types**  
 3 **and station-airport distance**

4 Honglei Wang<sup>1, 2</sup>, David W. Tarasick<sup>3\*</sup>, Jane Liu<sup>2\*</sup>, Herman G.J. Smit<sup>4</sup>, Roeland Van  
 5 Malderen<sup>5</sup>, Lijuan Shen<sup>6</sup>, Tianliang Zhao<sup>1</sup>

6 <sup>1</sup> China Meteorological Administration Aerosol-Cloud and Precipitation Key Laboratory, Nanjing University of  
 7 Information Science and Technology, Nanjing 210044, China;

8 <sup>2</sup>Department of Geography and Planning, University of Toronto, Canada;

9 <sup>3</sup> Environment and Climate Change Canada, 4905 Dufferin Street, Downsview, ON, M3H 5T4 Canada;

10 <sup>4</sup> Institute for Energy and Climate Research: Troposphere (IEK-8), Research Centre Juelich (FZJ), Juelich, Germany;

11 <sup>5</sup> Royal Meteorological Institute of Belgium, Brussels, Belgium;

12 <sup>6</sup> School of Atmosphere and Remote Sensing, Wuxi University, Wuxi 214105, China;

13

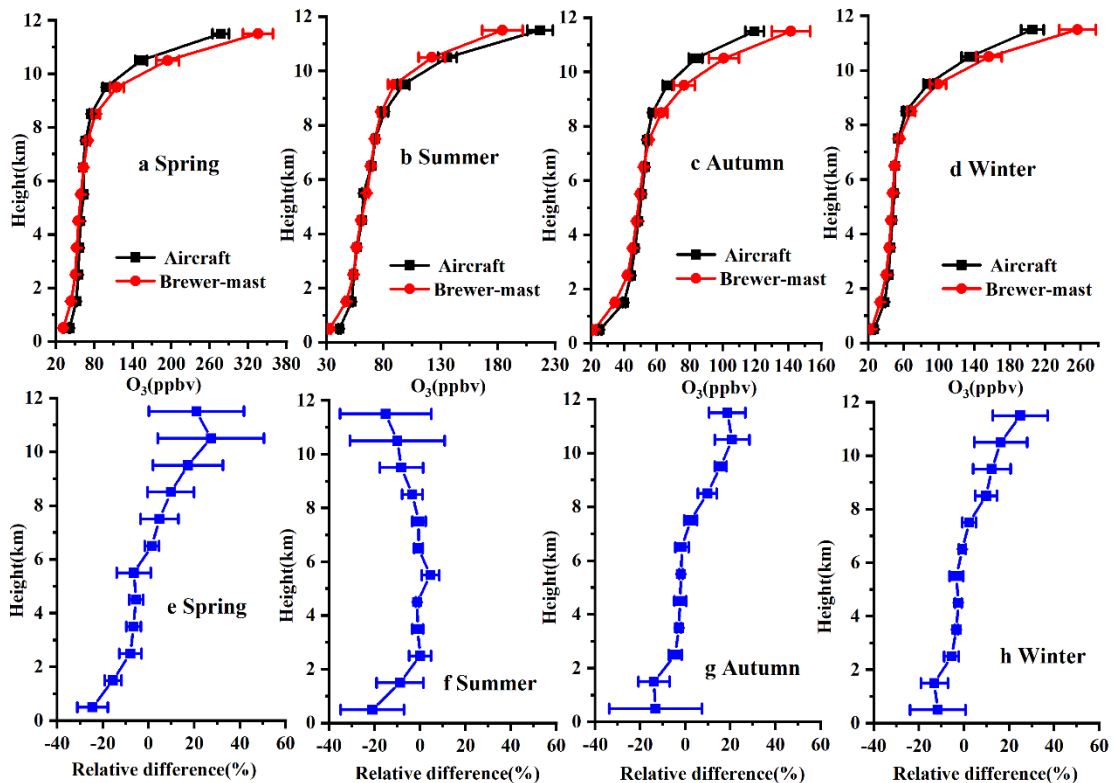

14

15 **Figure S1.** Comparison of vertical profiles of tropospheric O<sub>3</sub> (a-d) and the mean relative difference  
 16 (e-h) between Brewer-mast ozonesonde and aircraft observations in four seasons. Note that the  
 17 horizontal scales of the plots among (a)-(d), and among (e)-(h) are not the same.

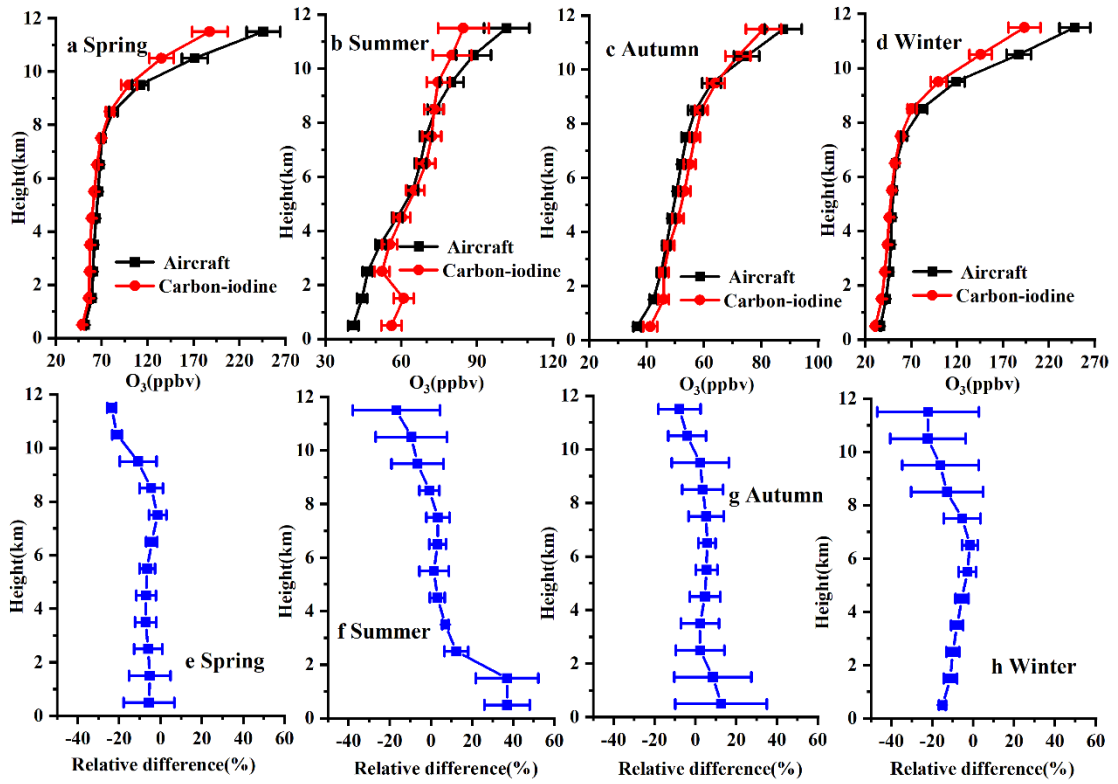

18

19 **Figure S2.** The same as Figure S1, but between Carbon-iodine ozonesonde and aircraft observations.

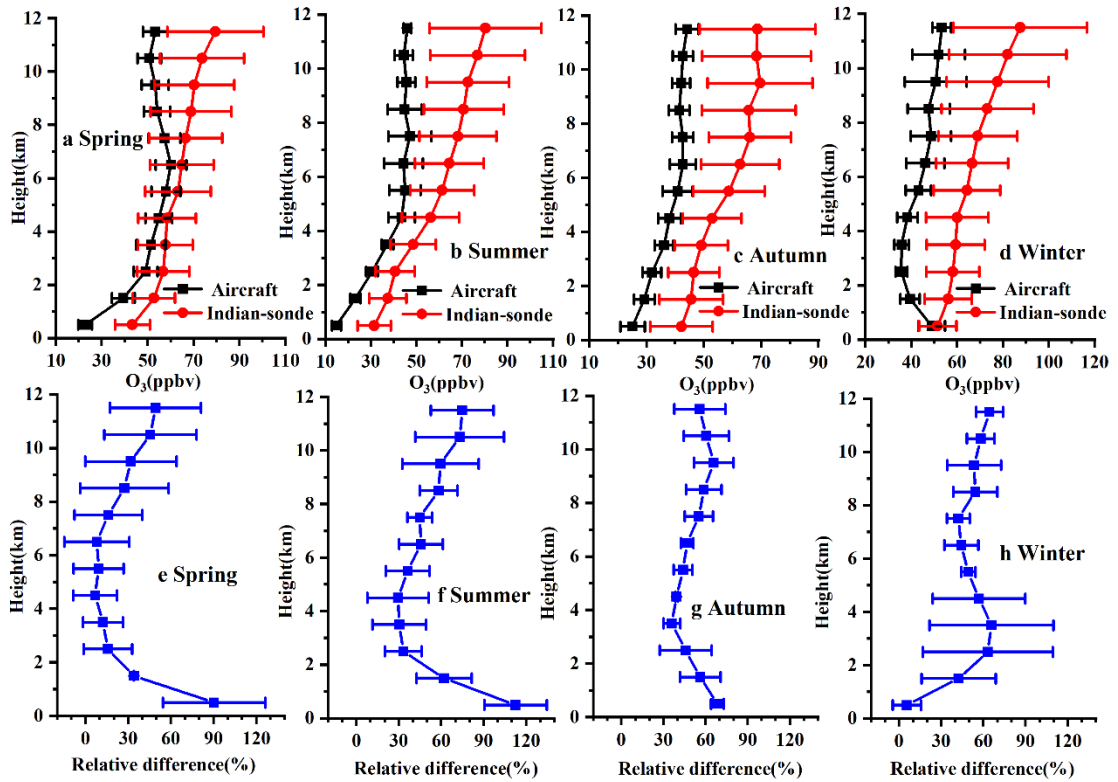

20

21 **Figure S3.** The same as Figure S1, but between Indian-sonde and aircraft observations.

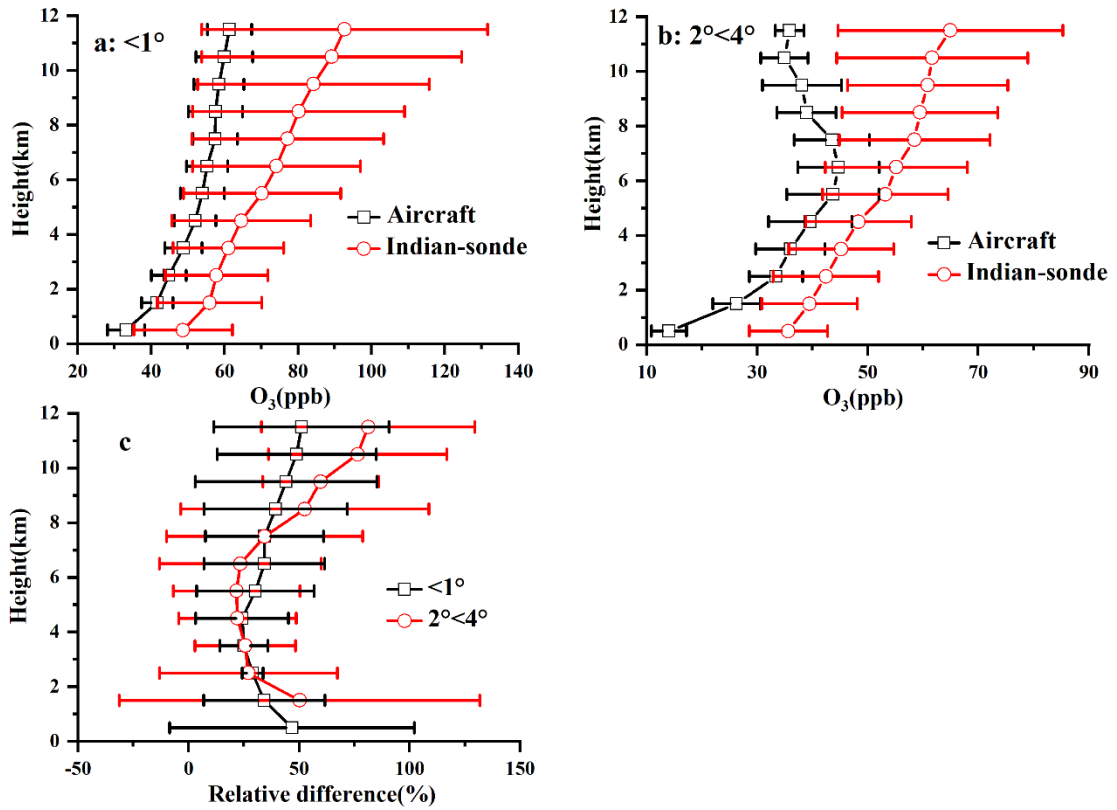

22

23 **Figure S4.** Vertical profiles of tropospheric O<sub>3</sub> (a and b) and the mean relative difference between

24 Indian-sonde and aircraft observations at different station-pair distances (c).

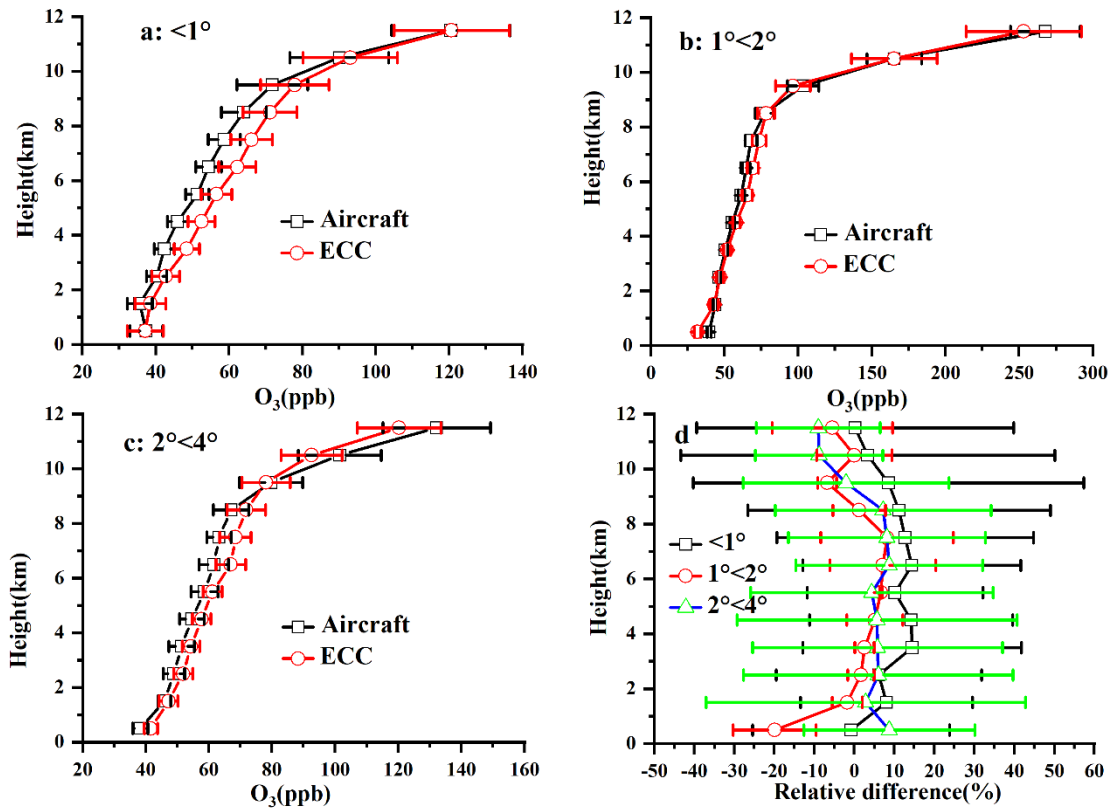

25

26 **Figure S5.** Vertical profiles of tropospheric O<sub>3</sub> (a-c) and the mean relative difference between ECC

27 ozonesonde and aircraft observations at different station-pair distances in summer (d).

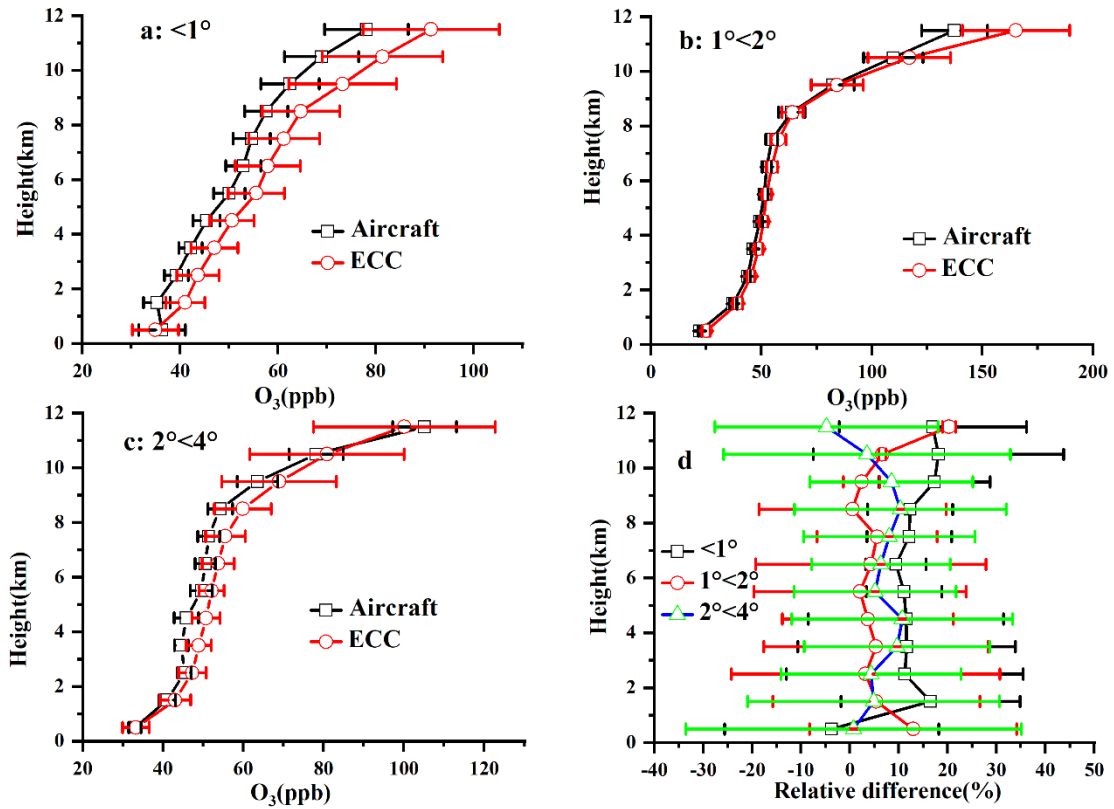

28

29 **Figure S6.** Vertical profiles of tropospheric O<sub>3</sub> (a-c) and the mean relative difference between ECC

30 ozonesonde and aircraft observations at different station-pair distances in autumn (d).

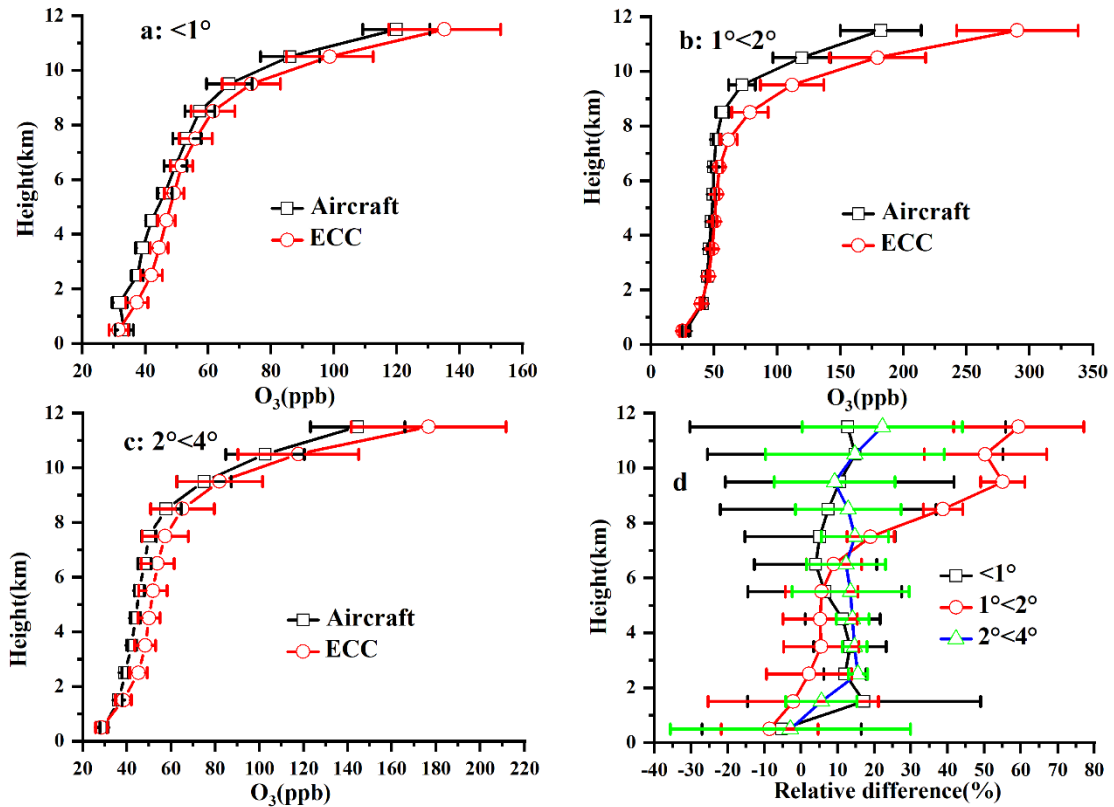

31

32 **Figure S7.** Vertical profiles of tropospheric O<sub>3</sub> (a-c) and mean relative difference between ECC  
33 ozonesonde and aircraft observations at different station-pair distances in winter (d).

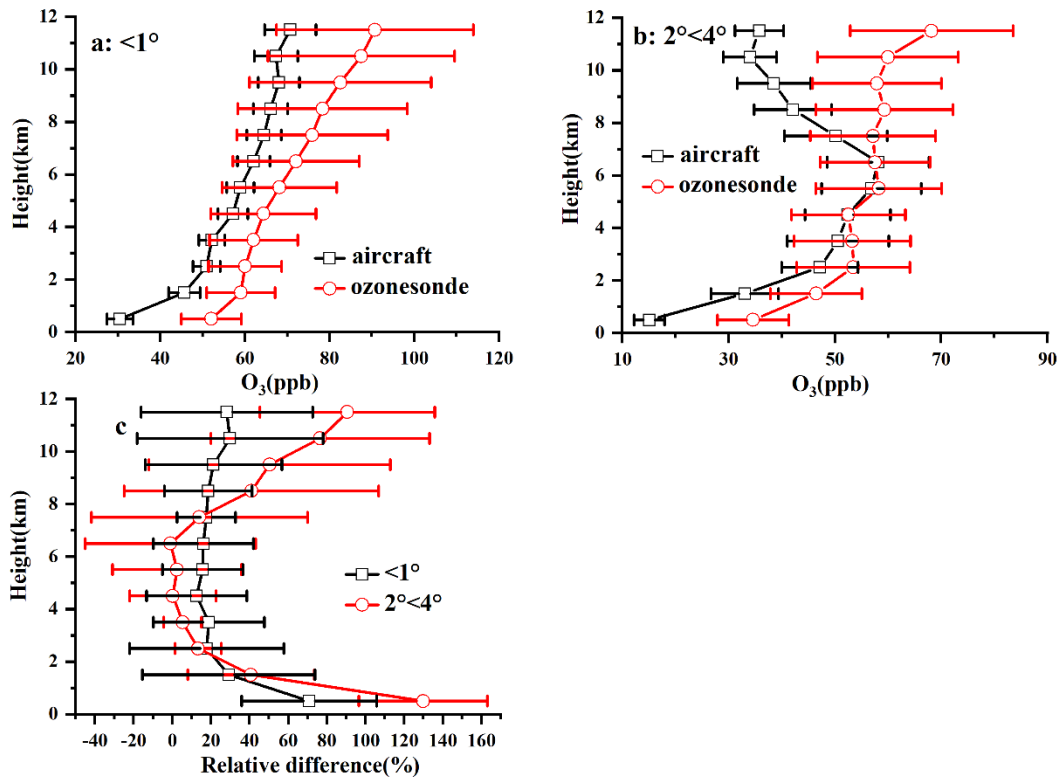

34  
35 **Figure S8.** Vertical profiles of tropospheric O<sub>3</sub> (a and b) and mean relative difference between  
36 Indian-sonde ozonesonde and aircraft observations at different station-pair distances in spring (c).

37
